# Supplementary material
Source: PubMed Central journal article supplement (PMC6987742)
Supplement: EBM896779_Supplemental_Material.pdf [file EBM896779_Supplemental_Material.pdf]

**Supplementary Table.**Relative viability of *S. aureus* and *P. aeruginosa* biofilms after treatments from 15 minutes to one hour

|           | <i>S. aureus</i> |            |        | <i>P. aeruginosa</i> |            |        |
|-----------|------------------|------------|--------|----------------------|------------|--------|
|           | 15 minutes       | 30 minutes | 1 hour | 15 minutes           | 30 minutes | 1 hour |
| 0.01% MC  | 0.326            | 0.267      | 0.297  | 0.486                | 0.636      | 0.391  |
| 0.01% QS  | 0.431            | 0.425      | 0.325  | 0.661                | 0.657      | 0.615  |
| 0.025% MC | 0.314            | 0.330      | 0.424  | 0.480                | 0.376      | 0.294  |
| 0.025% QS | 0.381            | 0.322      | 0.259  | 0.615                | 0.662      | 0.564  |
| 0.05% MC  | 0.297            | 0.356      | 0.329  | 0.342                | 0.180      | 0.214  |
| 0.05% QS  | 0.320            | 0.319      | 0.307  | 0.627                | 0.741      | 0.630  |

MC= CPC micelle solution

QS= CPC-quatsome

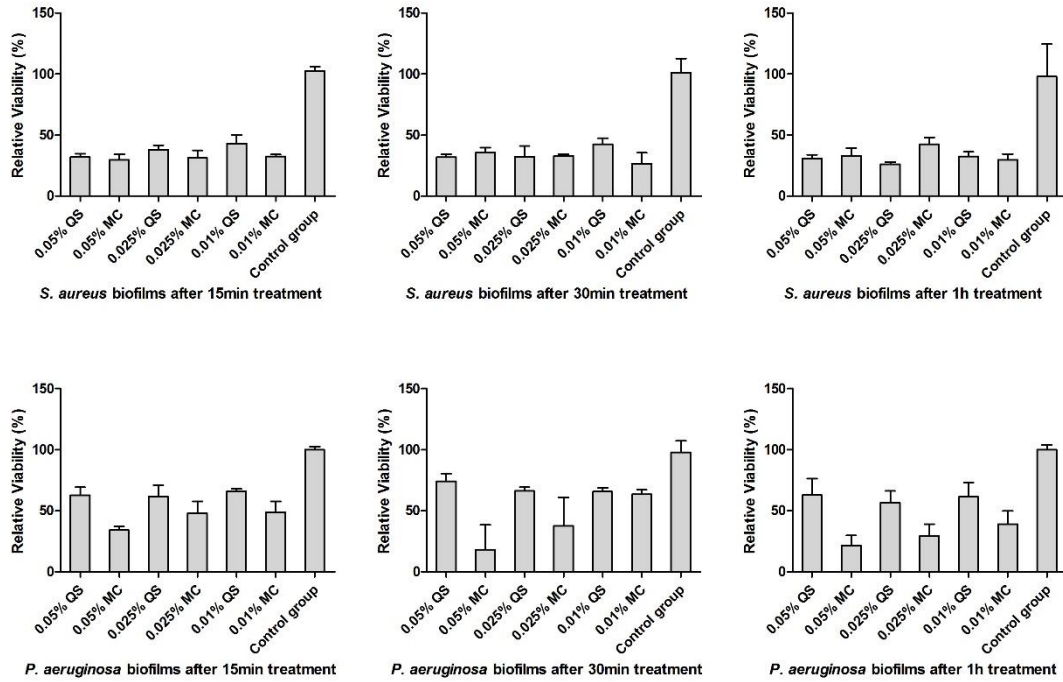

**Supplementary Figure.** Relative viabilities of *S. aureus* and *P. aeruginosa* biofilms after treatments with CPC-quatsomes and CPC micelle solutions for 15 minutes, 30 minutes and one hour. The viabilities of biofilms were quantified by the alamarBlue assay. The results were from three independent measurements with n=12. The histogram displayed medians with ranges. **MC:** CPC micelle solution, **QS:** CPC-quatsome.
